# Supplementary material for: Peptide aptamers define distinct EB1- and EB3-binding motifs and interfere with microtubule dynamics
Source: PubMed Central journal article supplement — Mol Biol Cell. 2014 Apr 1;25(7):1025–36. doi: 10.1091/mbc.E13-08-0504 (PMC3967968; doi:10.1091/mbc.e13-08-0504), 2014-04-01
Supplement: supp_E13-08-0504v1_CombinedSupMats.pdf.pdf [file supp_E13-08-0504v1_CombinedSupMats.pdf.pdf]

# Supplemental Materials

*Molecular Biology of the Cell*

Leśniewska et al.

## Legends for Supplementary Figures

**Figure S1:** Peptide aptamers (A) Free or single peptide aptamers and double constrained aptamers. In a free (or double constrained) aptamer, a short peptide is fused to the end of the protein. In a double constrained aptamer, a short peptide is inserted into a small scaffold protein, such as thioredoxin. (B) An aptamer has a high affinity to a protein of interest (EB1), and competes with an endogenous interacting protein (SxIP-containing protein) for binding.

**Figure S2:** The composition of the unselected SxIP library. (A) The DNA sequences of 39 random unselected clones from the SxIP prey library. The sequences were a heterogeneous mixture of nucleotides. K = G/T, n = A/T/C/G. (B) The amino acid sequences encoded by unselected clones from the prey SxIP library. "-" represents a stop codon. (C) The frequencies of amino acids for each position encoded by these unselected prey clones. Each position was tested for statistical differences from the frequency expected from random DNA sequences. "-",  $p \geq 0.05$ . "±",  $0.01 \leq p < 0.05$ . No significant differences were observed.

**Figure S3:** Protein sequences of EB1 aptamers isolated from the SxIP library. The amino acid sequences encoded by 45 random EB1 aptamers isolated from the XXXX library based on the aptamer Perfect sequence in which SRIP was replaced with 4 random residues.

**Figure S4:** The compositions of the unselected XXXX library and double constrained library. (A) The amino acid sequences encoded by 17 random unselected prey clones from the XXXX library. "-" represents a stop codon. (B) The frequencies of amino acids for each position encoded by these unselected prey clones. Each position was tested for statistical differences from the frequency expected from random DNA sequences. "-",  $p \geq 0.05$ . "±",  $0.01 \leq p < 0.05$ . "+",  $p < 0.01$ . (C) The amino acid sequences encoded by 10 random unselected prey clones from the double constrained SxIP-containing library. "-" represents a stop codon. (D) The frequencies of amino acids for each position encoded by these

unselected clones from double constrained SxIP-containing library. Each position was tested for statistical differences from the frequency expected from random DNA sequences. “–”,  $p \geq 0.05$ . “±”,  $0.01 \leq p < 0.05$ .

**Figure S5:** Strength of interaction between all double constrained aptamers and *Drosophila* EB1. It is measured by a quantitative assay for  $\beta$ -galactosidase activity and normalised for the cell density ( $A_{420}/A_{600}$ ). The five strongest ones were selected for further assays in triplicates together with aptamer 37 (Figure 2B).

**Figure S6:** Modelled structures of aptamer Perfect and an SxIP fragment of Sentin. *Drosophila* EB1 (green) complexed with aptamer Perfect (purple) or an SxIP fragment of the endogenous EB1 interactor Sentin (yellow) was modelled using a crystal structure of the complex between human EB1 $\Delta$ C8 and MACFp1 as a template. Some residues of *Drosophila* EB1 have changed their orientation after energy minimisation in comparison to human EB1 (pale blue). Aptamer Perfect is likely to interact with EB1 more strongly than the fragment of Sentin. Buried surface areas are estimated to be 3100.2 Å<sup>2</sup> with aptamer Perfect in comparison to 2972.7 Å<sup>2</sup> with the Sentin fragment. The main differences are W and V at the positions +2 and +3 on aptamer Perfect (highlighted in yellow), in contrast to P and S on Sentin.

**Figure S7:** (A) Residues at X, +1–+5 (underlined) in 18 known human EB1-interacting sequences are highlighted when they match to residues significantly overrepresented among aptamers to HsEB1 (green), HsEB3 (purple) or both (blue). (B) Residues at X, +1–+5 of SxIP sequences in three human proteins known to interact specifically with EB3, not EB1, are highlighted when they match to residues significantly overrepresented among aptamers to HsEB1 (green), HsEB3 (purple) or both (blue).

**Figure S8:** The sequences of oligonucleotides and DNA synthesised for this study. K = G/T,  
n = A/T/C/G.

## Legends for Supplementary Figures

**Movie S1:** Aptamer Perfect fused to GFP in haemocytes from third instar larvae carrying *Act5C-GAL4* and *UASp-GFP-aptamer Perfect*. This demonstrates that the aptamer is expressed in haemocytes and localised as expected. The width of the frame is 51  $\mu\text{m}$ . The images were taken every two seconds.

**Movie S2:** Growing microtubule plus ends in haemocytes from third instar larvae carrying *Ub-EB1-GFP* and *Act5C-GAL4*. EB1-GFP marks microtubule plus ends. The width of the frame is 51  $\mu\text{m}$ . The images were taken every two seconds.

**Movie S3:** Growing microtubule plus ends in haemocytes from third instar larvae carrying *Ub-EB1-GFP*, *Act5C-GAL4* and *UASp-GFP-aptamer Perfect*. The average growth rate is significantly slower in haemocytes expressing the aptamer and EB1-GFP than the control (Movie S2) only expressing EB1-GFP. The width of the frame is 51  $\mu\text{m}$ . The images were taken every two seconds.

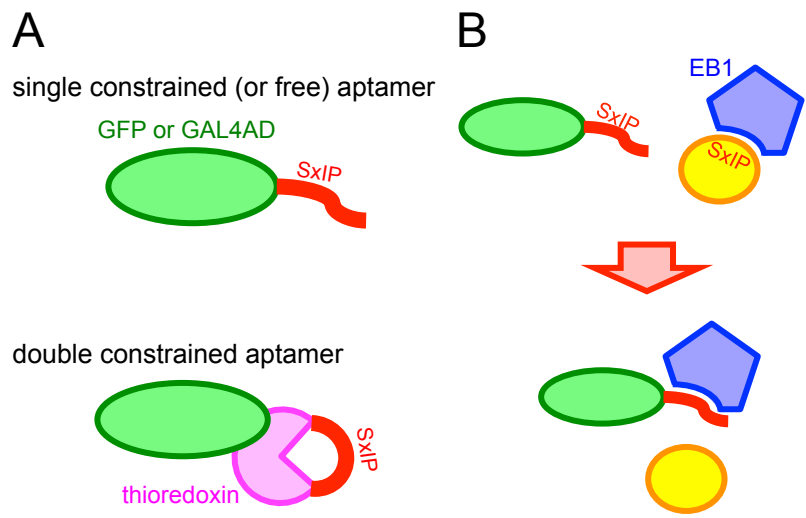

Figure S1

## A unselected SxIP library

nnKnnKnnKnnKnnKTCCnnKATTCAnnKnnKnnKnnKnnKnnKnnKTGA  
 1 GAGTTGTACTTGGTCCCTGGATTCCATCGGATGTTTGGGGGTGGCTTGA  
 2 TTTATGCAGAGTAGGTCCGGTATTCCAGAGATGGTGAGGGGGTGGGGTGA  
 3 GGTTCGTGGTCCGGTCCATTATTCCAATGGTTCGGTGGCTCAAGGGTGA  
 4 GCTGGGCGTATTGGGTCCACTATTCCAAGGCAGTTCATGTGGATCATTGA  
 5 ACTGAGACGCAGAAATCCAGTATTCCAGCTTTGTGGCGTGGCTTAGTTGA  
 6 CAGTTGGCTTTGGTGTCCGCGATTCCAAGTGTAGTCTTTATAAGCTTTGA  
 7 GTTGTGCGTGGGTTCCGTTATTCCAATGTGGGGTCAAGGGGGGGGGTGA  
 8 AGGCGGATGCATCCTTCCAGTATTCCACAGCGGGTGTATTGGGCGAGGTGA  
 9 TCGTAGTCGCTGTTGTCCCGTATTCCATAGATGCCGGAGCGGGTGTGTTGA  
 10 GGTCTGCATGTGTTTTCCAGATTCCACTTCATGTTATGACGAGGGTGTGA  
 11 CTGAAGCGAGTTTGTCCAATATTCCACCGTTGAGGGTTCAGACTAGGTGA  
 12 AGGTTTTTGTCTCAGTCCAATATTCCAATGTAGTCTTCTTGTATTTGA  
 13 GGGCTTGGGTTGGGGTCCGCGATTCCACTGGTGGATCGGGATGGTGCTTGA  
 14 ATTGGGAGGACGCTTCCGGGATTCCACCCTGTCCGTATCGTTCGGGTTGA  
 15 CGTGTGAGTATTGGTCCATGATTACAAATGTTTTACCTCGCATGATTGA  
 16 TGGGAGTTGTTGGGGTCCCGATTCCATGGTATCCTTTTACTTATCGGTGA  
 17 TCGCCTAGTGGTCCGGTCCAGGATCCAGGGCGGATATGGGGAGGTTTTGA  
 18 GGGCGGCTGGGGCGTCCGCTATTCCATGTCGTTATAGGAGGAATGATGA  
 19 CTGTGTTGAGTCTGCTCGGATTCCATAGTTTGGTGGGTGTATCAGTGA  
 20 GGGTGGTTCGGGTAGTCCCTATTCCCGAGTTGGGGGGAATGTTCTTGA  
 21 GGTATGTGTTGTTATCCGGGATTCCAGTGGGGTGGGGGGTCTTAAGTGA  
 22 TCGCGGCTTTGTGCGTCCCTATTCCAGATCTTTAGGAGATGAGGAGTTGA  
 23 CCTCGGTAGCGTACGTCCTGTATTCCAACGGCGTGTCTGGAGCGGTATTGA  
 24 TGTGGTGGGGTTATTCCTAGATTCCAAGTCGGAGTGGTATGTTTCAGTGA  
 25 GGTGTTTTGGTGTTCCTCCGATATTCCAAGGGTACGCCGCATCAGGGTTGA  
 26 CAGTATGGTAGTATTCCCTGGATTCCAATGCGGGGGGGTATGATTGTTGA  
 27 GGTGTGTTGAATCCGTCCTGTATTCCAGGGCGTTCGGTGGGTCGGCTTGA  
 28 CAGGAAGTTGATGGTCCGGGATTCCAACGGCGGCGCATGGGTTATTTGA  
 29 ATTAGTGGACGAGTCCATTATTCCAGCGGTGCGGTTGATTAAGTTGTTGA  
 30 CCGCGGAGTGGCGTGTCCGAGATTCCATCGACTTGTGGGCTATTTAGTGA  
 31 AGGCCGTGTCGGTGGTCCGGTACTCCATAGTAGAGTGTGAATGCCGAGTGA  
 32 CGGTAGAGTTATCAGTCCATTATTCCAGAGTAGTAGCGTTGGCGGTCTTGA  
 33 CTGAGGTATTCTGGTCCGGGATTCCATGGGTGAGGGGGCTGCTTGAGTGA  
 34 AGTTTGGCGTGGCGGTCCAGGATTCCAAAGGGTAGTTCGATTCCGGTTGGA  
 35 TATTCTGGTGGAGTCCTAGATTCCATTGAAGCTGGTGTGTACGATCGTG  
 36 TGGGATGCGATGGGGTCCCTCGATTCCATGGAGGTAGCATCGGCCTTTTGA  
 37 CAGTGTGGTGCATTCCCTGGATTCCAGGGGTGGTGGCGGGCCACTTGT  
 38 CGGTTGTTGGTGGGTTCCCATATTCCATAGAAGTGGTGTGGACGGTGTGA  
 39 CCGTGTGTGATGGGTTCCCGTATTCCACATTCTCGGGTGGATTCCGGTGA

## B

1 **ELYTWSWIPSDVCGVA-**  
 2 **FMQSRSGIPEMVRGLG-**  
 3 **GSWCGSIIPMVRLAQG-**  
 4 **AGRIGSTIPRQLHVDH-**  
 5 **TE'QNSSIPALWRWLS-**  
 6 **QLALVSAIPSVSLYKL-**  
 7 **VVRAVSVIPLWGQGGG-**  
 8 **RRMHPSSIPQRVDWAR-**  
 9 **S-SLLSRIP-MPERGC-**  
 10 **GLHVFSKIPLHVMTRV-**  
 11 **LKASLSNIPRLRVQTR-**  
 12 **RFLSQSNIPMLSLSCI-**  
 13 **GLGLGSAIPLVDRDGA-**  
 14 **IGRTSSGIPPCPYRSG-**  
 15 **RVSI GSMITNCF'FSHD-**  
 16 **WELLGSSIPWYPFYR-**  
 17 **SPSGRSRIPGADMGRF-**  
 18 **GRPGASAI PCRYRRE--**  
 19 **LCCSLSWIP-FGEVYQ-**  
 20 **GWLR-SSIPQLGGNCS-**  
 21 **GMCWLSGIPVGLGMLK-**  
 22 **SRLCASLIPDL-EMRS-**  
 23 **PR-RTSCIPTACLERY-**  
 24 **CGAGYS-IPSRSG-FQ-**  
 25 **GVLVVDIPRVTPHQG-**  
 26 **QYGSISWIPMRGGYDC-**  
 27 **GVLNPSCIPRSLGSA-**  
 28 **QEVDSGSIPTAAHWVI-**  
 29 **IRWTSSII PAVRLIKL-**  
 30 **PRSAVSEIPSTCWAI--**  
 31 **RPCRWSGTP--SVNAQ-**  
 32 **R-SYQSIPE--RWRS-**  
 33 **LRYSWSGIPWVRGLLE-**  
 34 **SLAWRSRIPKGRSIPVG**  
 35 **YSGE-S-IPLKLVCTIV**  
 36 **WDAMGSSIPWR-HAAF-**  
 37 **QCWCSSWIPGVDRPTC**  
 38 **RLLRGRSHIP-KWCQTV-**  
 39 **PCV-GSRIPHSRVDSR-**

## C

|                         | position |    |    |    |    |    |   |    |    |    |    |    |    |    |    |    | Average amino acid occurrence |          |          |
|-------------------------|----------|----|----|----|----|----|---|----|----|----|----|----|----|----|----|----|-------------------------------|----------|----------|
|                         | -5       | -4 | -3 | -2 | -1 | S  | x | I  | P  | +1 | +2 | +3 | +4 | +5 | +6 | +7 | +8                            | observed | expected |
| Ala                     | 1        | 0  | 5  | 2  | 2  | 0  | 3 | 0  | 0  | 2  | 3  | 1  | 0  | 3  | 3  | 3  | 0                             | 2.15     | 2.44     |
| Arg                     | 6        | 7  | 3  | 4  | 3  | 0  | 4 | 0  | 0  | 3  | 6  | 6  | 6  | 3  | 5  | 4  | 0                             | 4.62     | 3.66     |
| Asn                     | 0        | 0  | 0  | 1  | 1  | 0  | 2 | 0  | 0  | 1  | 0  | 0  | 0  | 2  | 0  | 0  | 0                             | 0.54     | 1.22     |
| Asp                     | 0        | 1  | 0  | 1  | 0  | 0  | 1 | 0  | 0  | 1  | 1  | 2  | 1  | 2  | 2  | 1  | 0                             | 1.00     | 1.22     |
| Cys                     | 1        | 3  | 3  | 3  | 0  | 0  | 2 | 0  | 0  | 1  | 2  | 2  | 2  | 1  | 2  | 2  | 1                             | 1.92     | 1.22     |
| Glu                     | 1        | 3  | 0  | 1  | 0  | 0  | 1 | 0  | 0  | 2  | 0  | 0  | 3  | 1  | 1  | 1  | 0                             | 1.08     | 1.22     |
| Gln                     | 4        | 0  | 1  | 1  | 2  | 0  | 0 | 0  | 0  | 2  | 1  | 0  | 1  | 1  | 2  | 3  | 0                             | 1.38     | 1.22     |
| Gly                     | 8        | 3  | 3  | 3  | 9  | 0  | 6 | 0  | 0  | 3  | 2  | 4  | 5  | 8  | 3  | 5  | 1                             | 4.85     | 2.44     |
| His                     | 0        | 0  | 1  | 1  | 0  | 0  | 1 | 0  | 0  | 1  | 1  | 0  | 3  | 1  | 1  | 1  | 0                             | 0.85     | 1.22     |
| Ile                     | 2        | 0  | 0  | 2  | 1  | 0  | 3 | 38 | 0  | 0  | 0  | 0  | 0  | 2  | 1  | 3  | 0                             | 1.08     | 1.22     |
| Leu                     | 3        | 6  | 7  | 4  | 4  | 0  | 1 | 0  | 0  | 4  | 5  | 3  | 5  | 1  | 4  | 2  | 0                             | 3.77     | 3.66     |
| Lys                     | 0        | 1  | 0  | 0  | 0  | 0  | 1 | 0  | 0  | 1  | 2  | 0  | 0  | 0  | 2  | 1  | 0                             | 0.62     | 1.22     |
| Met                     | 0        | 2  | 1  | 1  | 0  | 0  | 1 | 0  | 0  | 3  | 2  | 0  | 2  | 1  | 0  | 0  | 0                             | 1.00     | 1.22     |
| Phe                     | 1        | 1  | 0  | 0  | 1  | 0  | 0 | 0  | 0  | 0  | 1  | 1  | 1  | 0  | 1  | 2  | 0                             | 0.69     | 1.22     |
| Pro                     | 3        | 2  | 1  | 0  | 2  | 0  | 0 | 0  | 38 | 1  | 0  | 3  | 1  | 0  | 2  | 0  | 0                             | 1.15     | 2.44     |
| Ser                     | 4        | 2  | 5  | 6  | 2  | 39 | 5 | 0  | 0  | 4  | 1  | 5  | 1  | 2  | 3  | 4  | 0                             | 3.38     | 3.66     |
| Thr                     | 1        | 0  | 1  | 3  | 1  | 0  | 1 | 1  | 1  | 2  | 1  | 1  | 1  | 2  | 3  | 1  | 0                             | 1.54     | 2.44     |
| Trp                     | 2        | 1  | 3  | 2  | 3  | 0  | 4 | 0  | 0  | 3  | 1  | 2  | 1  | 4  | 0  | 0  | 0                             | 2.00     | 1.22     |
| Val                     | 1        | 4  | 2  | 2  | 4  | 0  | 1 | 0  | 0  | 1  | 7  | 5  | 5  | 2  | 2  | 3  | 1                             | 3.08     | 2.44     |
| Tyr                     | 1        | 1  | 2  | 1  | 2  | 0  | 0 | 0  | 0  | 0  | 1  | 1  | 1  | 2  | 2  | 1  | 0                             | 1.15     | 1.22     |
| *                       | 0        | 2  | 1  | 1  | 2  | 0  | 2 | 0  | 0  | 4  | 2  | 3  | 0  | 1  | 0  | 1  | 36                            | 1.46     | 1.22     |
| Different from expected | ±        | -  | -  | -  | ±  | NA | - | NA | NA | -  | -  | -  | -  | -  | -  | ±  | NA                            |          |          |

Figure S2

\* \* \*

1 RTRHVSLIPRWVDRT-  
2 KYKWRSRFQSGRMLG  
3 GAVKNSRIPRYIGWRG-  
4 ITTRPSLIPRWVGRGG-  
5 GARGRSKIPRWSAGG-  
6 LTASTSRIPPLGVWEFV  
7 GTPRRSRIPRWRNRGG-  
8 KERHTSRIPRWQSGNS-  
9 VARRQSLIPWRGRSR-  
10 VARFRSRIPVFVGSGR-  
11 RAVSRSRIPWRRAMG-  
12 SPGGLSRIPRWTGL-GC  
13 AGMFKSRIPIRRRVHKP-  
14 REFGRSLIPWRGRGTG-  
15 RNCKPSRIASDGEVEVL  
16 SACAGSRIPVWRGRCG-  
17 RFFQKSRIPRWTRGHD-  
18 QICARSRIPKWVGRNS-  
19 KWKVKSIPVKAARM-  
20 PVRQSSSIPRWKGGRV-  
21 KNCGKSRIPVLQRRVS-  
22 ARVFGSRIPVRTAPSK-  
23 FPPYRSRIPVVR-VL-  
24 QRRAVSRIPRPLKVPS-  
25 AISRRSRIPVMLRSQR-  
26 RWMSVSRIPVLRGRR-  
27 RCVSRSKIPKLCLSWYL  
28 SNGWKSRIPRWCQR-W-  
29 LTVAQSRIPRYLGRRS-  
30 SPLRVSKIPRWLGWNR-  
31 KMRGVSKIPIRKANSS-  
32 RGKMPSLIPRWGGVGK-  
33 ERRVRSVIPVWRGWRG-  
34 HGSYRSVIPRWIGWKG-  
35 NGGGRSRIPVYRLRRG-  
36 VVVRASKIPRWVGRLP-  
37 RWVGSRIPRWVGWES-  
38 RRCRRSRIPRWFRGRL-  
39 RPSGVSGIPRWRGRVG-  
40 RTNFVSRIPRWRG-RLG  
41 LQSRRSRIPRWVGCRQ-  
42 RRRVVSkipRWCGAPT-  
43 RGGWRSRIPRWGNVW-  
44 KKNW-SRIPVMALESSV  
45 AGGLRSRIPVVNACGL

Figure S3



**A** unselected XXXX library

```

*****      *****
1  RTRGRRWRFRWVGRRG-
2  RTRGRLFCSRWVGRRG-
3  RTRGRSGNFRWVGRRG-
4  RTRGRDLVFRWVGRRG-
5  RTRGR-HAARWVGRRG-
6  RTRGRRGRARWVGRRG-
7  RTRGRLRGCRWVGRRG-
8  RTRGRWPFLRWVGRRG-
9  RTRGRLELPRWVGRRG-
10 RTRGRVEYLRWVGRRG-
11 RTRGRL-LRRWVGRRG-
12 RTRGRR-YFRWVGRRG-
13 RTRGRL-LRRWVGRRG-
14 RTRGRMGRWRWVGRRG-
15 RTRGRLILFRWVGRRG-
16 RTRGR-KMLRWVGRRG-
17 RTRGREWSLRWVGRRG-

```

**B**

|                         | Position |    |    |    | Average amino acid occurrence |          |
|-------------------------|----------|----|----|----|-------------------------------|----------|
|                         | X1       | X2 | X3 | X4 | observed                      | expected |
| Ala                     | 0        | 0  | 1  | 2  | 0.75                          | 1.13     |
| Arg                     | 3        | 1  | 3  | 2  | 2.25                          | 1.69     |
| Asn                     | 0        | 0  | 1  | 0  | 0.25                          | 0.56     |
| Asp                     | 1        | 0  | 1  | 0  | 0.25                          | 0.56     |
| Cys                     | 0        | 0  | 1  | 1  | 0.50                          | 0.56     |
| Glu                     | 1        | 2  | 0  | 0  | 0.75                          | 0.56     |
| Gln                     | 0        | 0  | 0  | 0  | 0.00                          | 0.56     |
| Gly                     | 0        | 3  | 1  | 0  | 1.00                          | 1.13     |
| His                     | 0        | 1  | 0  | 0  | 0.25                          | 0.56     |
| Ile                     | 0        | 1  | 0  | 0  | 0.25                          | 0.56     |
| Leu                     | 6        | 1  | 4  | 4  | 3.75                          | 1.69     |
| Lys                     | 0        | 1  | 0  | 0  | 0.25                          | 0.56     |
| Met                     | 1        | 0  | 1  | 0  | 0.50                          | 0.56     |
| Phe                     | 0        | 1  | 1  | 6  | 2.00                          | 0.56     |
| Pro                     | 1        | 1  | 0  | 1  | 0.75                          | 1.13     |
| Ser                     | 1        | 0  | 1  | 1  | 0.75                          | 1.69     |
| Thr                     | 0        | 1  | 0  | 0  | 0.25                          | 1.13     |
| Trp                     | 1        | 2  | 0  | 1  | 1.00                          | 0.56     |
| Val                     | 1        | 0  | 1  | 0  | 0.50                          | 1.13     |
| Tyr                     | 0        | 0  | 2  | 0  | 0.50                          | 0.56     |
| *                       | 2        | 3  | 0  | 0  | 1.25                          | 0.56     |
| Different from expected | -        | -  | -  | +  |                               |          |

**C** unselected double constrained library

```

* **
FKYLMSYIPYWCIRWR
RSIVSWSVIPINWLAGR
NACYYSWIPLWQRLWI
RTVSCSYIPLRDSWR
ERMGFSFIPLSRWGLR
TAMILSTIPMGGT-SW
VGRQKSRIPLSCATR
RPRVSSRIPWNAVDWE
GDYASLIPKDVTYVP
EWGLSQIPVSVYYVS

```

**D**

|                         | position |    |    |    |    |    |   |    |    |    |    |    |    |    | Average amino acid occurrence |    |          |          |
|-------------------------|----------|----|----|----|----|----|---|----|----|----|----|----|----|----|-------------------------------|----|----------|----------|
|                         | -5       | -4 | -3 | -2 | -1 | S  | x | I  | P  | +1 | +2 | +3 | +4 | +5 | +6                            | +7 | observed | expected |
| Ala                     | 0        | 2  | 0  | 0  | 1  | 0  | 0 | 0  | 0  | 0  | 0  | 1  | 1  | 2  | 0                             | 0  | 0.54     | 0.63     |
| Arg                     | 3        | 1  | 2  | 0  | 0  | 0  | 2 | 0  | 0  | 0  | 1  | 1  | 1  | 0  | 2                             | 3  | 1.23     | 0.94     |
| Asn                     | 1        | 0  | 0  | 0  | 0  | 0  | 0 | 0  | 0  | 0  | 2  | 0  | 0  | 0  | 0                             | 0  | 0.23     | 0.31     |
| Asp                     | 0        | 0  | 1  | 0  | 0  | 0  | 0 | 0  | 0  | 0  | 1  | 1  | 0  | 1  | 0                             | 0  | 0.31     | 0.31     |
| Cys                     | 0        | 0  | 1  | 0  | 1  | 0  | 0 | 0  | 0  | 0  | 0  | 2  | 0  | 0  | 0                             | 0  | 0.31     | 0.31     |
| Glu                     | 1        | 1  | 0  | 0  | 0  | 0  | 0 | 0  | 0  | 0  | 0  | 0  | 0  | 0  | 1                             | 0  | 0.23     | 0.31     |
| Gln                     | 0        | 0  | 0  | 1  | 0  | 0  | 1 | 0  | 0  | 0  | 0  | 1  | 0  | 0  | 0                             | 0  | 0.23     | 0.31     |
| Gly                     | 0        | 2  | 0  | 2  | 0  | 0  | 0 | 0  | 0  | 0  | 1  | 1  | 0  | 1  | 1                             | 0  | 0.62     | 0.63     |
| His                     | 0        | 0  | 0  | 0  | 0  | 0  | 0 | 0  | 0  | 0  | 0  | 0  | 0  | 0  | 0                             | 0  | 0.00     | 0.31     |
| Ile                     | 0        | 0  | 1  | 1  | 0  | 0  | 0 | 10 | 0  | 1  | 0  | 0  | 1  | 0  | 0                             | 1  | 0.38     | 0.31     |
| Leu                     | 0        | 0  | 0  | 1  | 2  | 0  | 1 | 0  | 0  | 4  | 0  | 0  | 1  | 1  | 1                             | 0  | 0.85     | 0.94     |
| Lys                     | 0        | 1  | 0  | 0  | 1  | 0  | 0 | 0  | 0  | 1  | 0  | 0  | 0  | 0  | 0                             | 0  | 0.23     | 0.31     |
| Met                     | 0        | 0  | 2  | 0  | 1  | 0  | 0 | 0  | 0  | 1  | 0  | 0  | 0  | 0  | 0                             | 0  | 0.31     | 0.31     |
| Phe                     | 1        | 0  | 0  | 0  | 1  | 0  | 1 | 0  | 0  | 0  | 0  | 0  | 0  | 0  | 0                             | 0  | 0.23     | 0.31     |
| Pro                     | 0        | 1  | 0  | 0  | 0  | 0  | 0 | 10 | 0  | 0  | 0  | 0  | 0  | 0  | 1                             | 0  | 0.15     | 0.63     |
| Ser                     | 0        | 1  | 0  | 1  | 1  | 10 | 0 | 0  | 0  | 0  | 3  | 0  | 1  | 0  | 1                             | 1  | 0.69     | 0.94     |
| Thr                     | 1        | 1  | 0  | 0  | 0  | 0  | 1 | 0  | 0  | 0  | 0  | 0  | 2  | 0  | 1                             | 0  | 0.46     | 0.63     |
| Trp                     | 0        | 0  | 1  | 0  | 1  | 0  | 1 | 0  | 0  | 1  | 2  | 1  | 1  | 2  | 2                             | 2  | 1.08     | 0.31     |
| Val                     | 1        | 0  | 1  | 2  | 0  | 0  | 1 | 0  | 0  | 1  | 0  | 2  | 1  | 0  | 2                             | 0  | 0.85     | 0.63     |
| Tyr                     | 0        | 0  | 1  | 2  | 1  | 0  | 2 | 0  | 0  | 1  | 0  | 0  | 1  | 2  | 0                             | 0  | 0.77     | 0.31     |
| *                       | 0        | 0  | 0  | 0  | 0  | 0  | 0 | 0  | 0  | 0  | 0  | 0  | 0  | 0  | 1                             | 0  | 0.08     | 0.31     |
| Different from expected | -        | -  | -  | -  | -  | NA | - | NA | NA | -  | ±  | -  | -  | ±  | -                             | -  |          |          |

Figure S4

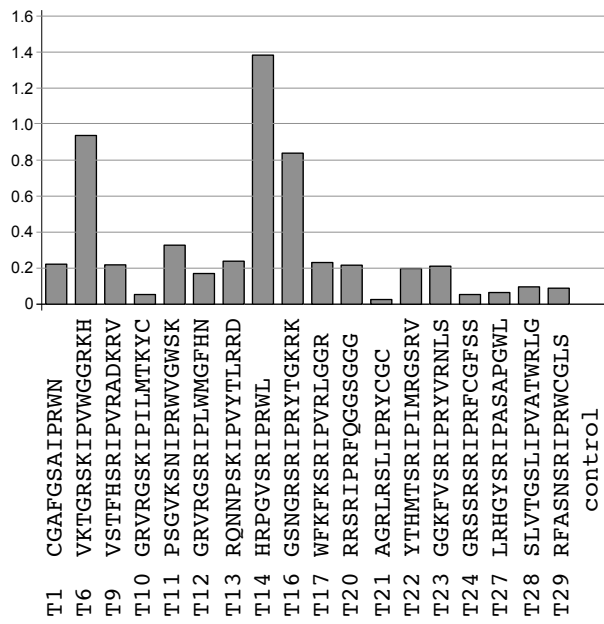

Figure S5

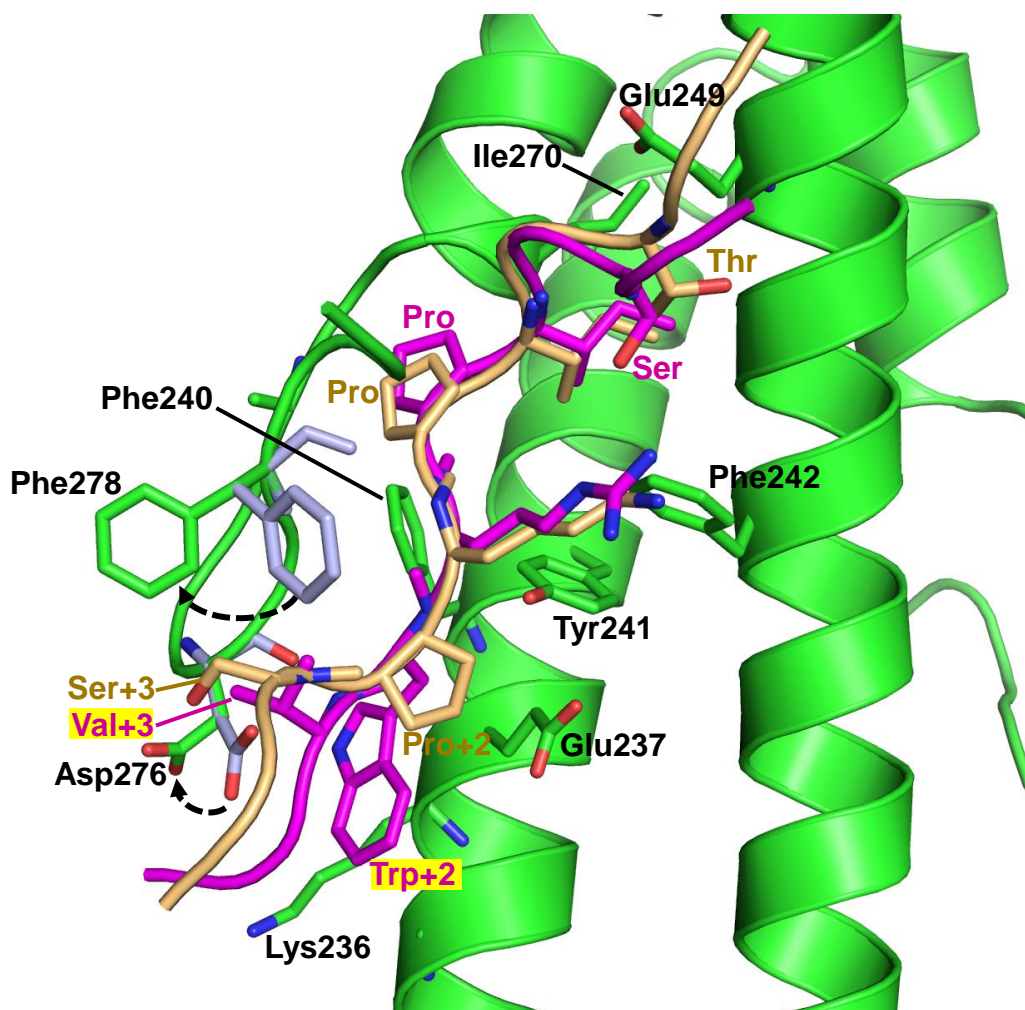

Figure S6

# A

known human EB1-  
interacting sequences

CLASP1 GLARS**SRIP**PSMSQG  
CLASP2 SAQKR**SKIP**RSQ**G**CSR  
CLASP2 SVARS**SRIP**PSVSQG  
MACF1 GLNKP**SKIPT**MSKKTT  
APC TSARP**SQIPT**PVNNNT  
STIM1 QASRN**TRIP**HL**G**KKA  
MCAK RRSVN**SKIP**AP**K**ESLR  
KI18B KRQRQ**SFLP**CL**R**RGSL  
KI18B GPKPT**SSLP**GT**S**ACKK  
SLAIN2 FQVPNGG**IP**RMQ**P**QAS  
SLAIN2 MQPQA**SAIP**SPG**K**FRS  
SLAIN2 TTAMR**SGLP**PSAPSA  
SLAIN2 AQPVRR**SLP**AP**K**TYGS  
SLAIN2 SAPSAGG**IP**VPRSKLA  
SALIN2 AQPVRR**SLP**AP**K**TYGS  
CK5P2 REAKK**SRLP**IL**I**KPSR  
PSRC1 AVKSS**SRLP**VPSAIPK  
PSRC1 RLPVP**SAIP**KPAT**R**V  
\* - \*\*

residues overrepresented  
among aptamers to  
HsEB1 only (11)  
HsEB3 only (5)  
Both (13)

# B

known human proteins that  
interact specifically with EB3

**ANK2**  
EQKGR**SKIP**I**R**V**K**GKE  
EVQPP**SPLP**SSMDSNS  
FTESK**SKIP**V**R**TMPTS  
EAKPK**SKLP**V**K**VPLQR  
PKILT**SRLP**V**K**SRSTT  
\* - \*\*

**Drebrin**  
RRMAP**TPIPT**R**S**PSDS  
\* - \*\*

**Myosin 1B**  
no SxIP

residues overrepresented  
among aptamers to  
HsEB1 only (2)  
HsEB3 only (5)  
Both (7)

Figure S7

### DmEB1 bait plasmid

oKMT17:cggaagagagtagtaacaaaggtcaaagacagttgactgtatcgccggaatggctgtaaactctactc  
oKMT18:agaaattcgcccgaattagcttggtgcaggtcgacggatccccgggaattaatactctctcctctg

### HsEB1 bait plasmid

oKMT82:cggaagagagtagtaacaaaggtcaaagacagttgactgtatcgccggaatggcagtgaaactataactcaac  
oKMT83:agaaattcgcccgaattagcttggtgcaggtcgacggatccccgggaattaatactctctctctctctct

### HsEB3 bait plasmid

oKMT84:cggaagagagtagtaacaaaggtcaaagacagttgactgtatcgccggaatggcgtcaatgtgtactccac  
oKMT85:agaaattcgcccgaattagcttggtgcaggtcgacggatccccgggaatcagactcgtcctggtctctct

### SxIP prey library

oKMT34:ACTTGCGGGGTTTTTTCAGTATCTACGATTCATAGATCTCTCGAGCTCGAA  
oKMT46:TACGCTAGCTTGGGTGGTCATATGGCCATGGAGGCCCGGGGATCCGAnnknnknnknnknnkTCCnnkATTCCAn  
nknnknnknnknnknnknnkTGATTCGAGCTCGAGAGATCTATG

### XXXX prey library

oKMT34:ACTTGCGGGGTTTTTTCAGTATCTACGATTCATAGATCTCTCGAGCTCGAA  
oKMT68:TACGCTAGCTTGGGTGGTCATATGGCCATGGAGGCCCGGGGATCCGACGAACCCGAGGCCGAnnknnknnknnk  
GATGGGTGGGCCGACGAGGCTGATTCGAGCTCGAGAGATCTATG

### Double constrained SxIP prey library

oKMT64:ATATTGCTCAGCGATTTTCATCCAGAATCGGGGCGATCATTTTGCACGG  
oKMT63:AAAGCGGACGGGGCGATCCTCGTCGATTTCTGGGCAGAGTGGTGCGGTnnknnknnknnknnkTCCnnkATTCCAn  
nknnknnknnknnknnknnkCCGTGCAAAATGATCGCCCCGATT

### The prey plasmid for tetramer of aptamer 37

pKMT169:  
ATCTGTATGGCTTACCCATACGATGTTCCAGATTACGCTAGCTTGGGTGGTCATATGGCCATGGAGGCCCGGGGATCCGA  
cgt tgt gtt tcc cgt tcc aaa att cca aaa ttg tgt ttg tcc tgg tat ttg att cgt gct cgt gaa att tat gaa tcc tcc ggt tcc ggt  
agg tgt gtg tgg agg tgg aaa ata cct aaa ctt tgt ctt tgg tgg tat ctt ata agg gca agg gaa ata tat gaa tgg tgg ggc agt ggc  
aga tgc gtc agt aga agt aag atc ccc aag ctg tgc ctg agt tgg tac ctg atc aga gcc aga gag atc tac gag agt agt gga tgg gga  
cgt tgc gta agc aga agc aag ata ccg aaa ttg tgc ttg agc tgg tac ctt att agg gcg aga gaa att tac gaa agc  
TAGTTCGAGCTCGAGAGATCTATGAATCGTAGATACTGAAAAACCCCGCAAGTTCACCTCAACTGTGCATCGTG

### The prey plasmid for septamer of aptamer Perfect

pKMT170:  
ATCTGTATGGCTTACCCATACGATGTTCCAGATTACGCTAGCTTGGGTGGTCATATGGCCATGGAGGCCCGGGGATCCGA  
cgt acg cgt ggt cgt agc cgt att ccg cgt tgg gtg ggt cgt cgt ggt tcc ggt agt ggt  
cgt acc aga ggt cgt tcc cgt ata cca cgt tgg gta ggt aga agg ggt agc gcc tcc gcc  
aga act aga gcc aga tgg aga atc ccc agg tgg gtc gcc cgt aga gcc agt gga agc gga  
aga acg aga ggt aga agc aga atc ccg aga tgg gtg gcc aga aga gcc tgg gcc agc ggt  
agg aca agg gga agg agt agg ata cct cgt tgg gtc ggt agg agg gga tcc gga tgg gcc  
agg acg cgt ggt agg agc agg att ccg agg tgg gtg gga cgt cgt gga agt ggt tcc gga  
cgt act agg ggt aga tgg cgt atc cct aga tgg gta gga aga cgt gcc  
TAGTTCGAGCTCGAGAGATCTATGAATCGTAGATACTGAAAAACCCCGCAAGTTCACCTCAACTGTGCATCGTG

### The prey plasmid for dimer of aptamer 37

oKMT31:GTATGGCTTACCCATACG  
oKMT69:ATTCATAGATCTCTCGAGCTCGAACTACGATTCATATATTTCCCTTGCCCT

Figure S8
